# Supplementary material
Source: Springer Nature journal article supplement (https://www.springermedizin.de/resource/supplementary/13075_2006_1952_MOESM1_ESM.pdf/9690958)

Supplemental Figure 1: Massicotte et al

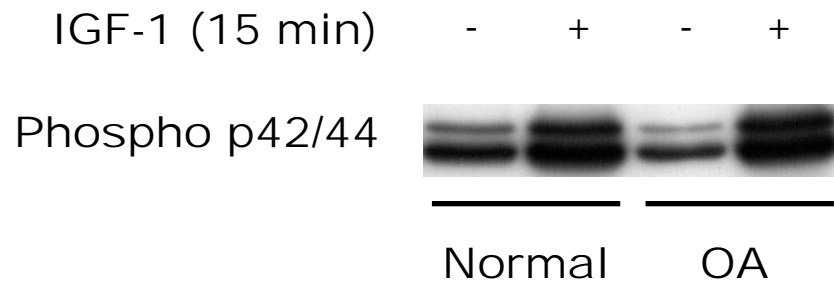

Supplement: MOESM1 [file 9690958]
